# Supplementary material
Source: MDPI journal article supplement (https://www.mdpi.com/2071-1050/14/10/5976)
Supplement: s1 [file s1]

Archive with 2 entries (2 files):
- File S2 Reference prices.xlsx
- SI for Sustainability_Na_LCA and CLCC_2.pdf
