# Supplementary material
Source: MDPI journal article supplement (https://www.mdpi.com/2071-1050/14/10/5976)
Supplement: s1 [file s1 › File S2 Reference prices.xlsx]

## Sheet: ref_prices_delim
source	comm	um	critical	mean	min	max
comext	Tellurium	kg	no	52.7377	10.7255	212.628
comext	Praseodymium	kg	yes	22.0564	15.0091	39.6932
comext	Europium	kg	yes	69.3043	55.093	111.11
comext	Indium	kg	yes	281.197	82.5651	493.079
comext	Gallium	kg	yes	273.888	132.677	621.548
comtrade	Sodium chloride	kg	no	0.0438363	0.0368132	0.0515058
comtrade	Sulfur	kg	no	0.101779	0.0519828	0.139478
comtrade	Metamorphous rock, graphite containing	kg	no	0.940957	0.706365	1.2968
comtrade	Sand	kg	no	0.0181673	0.0054772	0.0338595
comtrade	Kaolinite	kg	no	0.129495	0.116558	0.146369
comtrade	Clay, unspecified	kg	no	0.0957905	0.083	0.105357
comtrade	Clay, bentonite	kg	no	0.126937	0.118509	0.142179
comtrade	Barite	kg	yes	0.118467	0.0860615	0.161987
comtrade	Diatomite	kg	no	0.354125	0.285158	0.471923
comtrade	Granite	kg	no	0.0913667	0.0700987	0.110826
comtrade	Basalt	kg	no	0.0913667	0.0700987	0.110826
comtrade	Gravel	kg	no	0.01137	0.0104299	0.0126821
comtrade	Dolomite	kg	no	0.0305859	0.0256829	0.0422791
comtrade	Magnesite	kg	no	0.195233	0.0538165	0.311104
comtrade	Gypsum	kg	no	0.030155	0.0252328	0.034654
comtrade	Anhydrite	kg	no	0.0178214	0.0150351	0.0213552
comtrade	Chrysotile	kg	no	0.313853	0.262578	0.396404
comtrade	Talc	kg	no	0.274601	0.241218	0.328196
comtrade	Ulexite	kg	no	0.276332	0.240941	0.315403
comtrade	Borax	kg	yes	0.276332	0.240941	0.315403
comtrade	Feldspar	kg	no	0.0378487	0.0334636	0.0416037
comtrade	Fluorspar	kg	yes	0.289684	0.213644	0.418193
comtrade	Perlite	kg	no	0.0957756	0.0867442	0.104285
comtrade	Kieserite	kg	no	0.200571	0.188131	0.213312
comtrade	Copper, 0.99% in sulfide, Cu 0.36% and Mo 8.2E-3% in crude ore	kg	no	2.03107	1.17736	2.72637
comtrade	Copper, 0.52% in sulfide, Cu 0.27% and Mo 8.2E-3% in crude ore	kg	no	2.03107	1.17736	2.72637
comtrade	Copper, 1.42% in sulfide, Cu 0.81% and Mo 8.2E-3% in crude ore	kg	no	2.03107	1.17736	2.72637
comtrade	Copper, 2.19% in sulfide, Cu 1.83% and Mo 8.2E-3% in crude ore	kg	no	2.03107	1.17736	2.72637
comtrade	Copper, Cu 0.2%, in mixed ore	kg	no	2.03107	1.17736	2.72637
comtrade	Copper, 0.59% in sulfide, Cu 0.22% and Mo 8.2E-3% in crude ore	kg	no	2.03107	1.17736	2.72637
comtrade	Copper, Cu 5.2E-2%, Pt 4.8E-4%, Pd 2.0E-4%, Rh 2.4E-5%, Ni 3.7E-2% in ore	kg	no	2.03107	1.17736	2.72637
comtrade	Copper, 0.97% in sulfide, Cu 0.36% and Mo 4.1E-2% in crude ore	kg	no	2.03107	1.17736	2.72637
comtrade	Copper, 1.18% in sulfide, Cu 0.39% and Mo 8.2E-3% in crude ore	kg	no	2.03107	1.17736	2.72637
comtrade	Copper, 1.13% in sulfide, Cu 0.76% and Ni 0.76% in crude ore	kg	no	2.03107	1.17736	2.72637
comtrade	Copper, Cu 0.38%, Au 9.7E-4%, Ag 9.7E-4%, Zn 0.63%, Pb 0.014%, in ore	kg	no	2.03107	1.17736	2.72637
comtrade	Copper, Cu 3.2E+0%, Pt 2.5E-4%, Pd 7.3E-4%, Rh 2.0E-5%, Ni 2.3E+0% in ore	kg	no	2.03107	1.17736	2.72637
comtrade	Nickel, 1.98% in silicates, 1.04% in crude ore	kg	no	0.0496242	0.0313318	0.0701949
comtrade	Nickel, Ni 2.3E+0%, Pt 2.5E-4%, Pd 7.3E-4%, Rh 2.0E-5%, Cu 3.2E+0% in ore	kg	no	0.0496242	0.0313318	0.0701949
comtrade	Nickel, 1.13% in sulfide, Ni 0.76% and Cu 0.76% in crude ore	kg	no	0.0496242	0.0313318	0.0701949
comtrade	Nickel, Ni 2.5E+0%, in mixed ore, in ground	kg	no	0.0496242	0.0313318	0.0701949
comtrade	Nickel, Ni 3.7E-2%, Pt 4.8E-4%, Pd 2.0E-4%, Rh 2.4E-5%, Cu 5.2E-2% in ore	kg	no	0.0496242	0.0313318	0.0701949
comtrade	Cobalt, Co 5.0E-2%, in mixed ore, in ground	kg	no	1.76653	0.143623	3.55078
comtrade	Lead, Pb 3.6E-1%, in mixed ore	kg	no	1.59287	1.27449	2.25937
comtrade	Lead, Pb 0.014%, Au 9.7E-4%, Ag 9.7E-4%, Zn 0.63%, Cu 0.38%, in ore	kg	no	1.59287	1.27449	2.25937
comtrade	Zinc, Zn 0.63%, Au 9.7E-4%, Ag 9.7E-4%, Cu 0.38%, Pb 0.014%, in ore	kg	no	0.724466	0.576059	1.00351
comtrade	Zinc, Zn 3.1%, in mixed ore	kg	no	0.724466	0.576059	1.00351
comtrade	Molybdenum, 0.010% in sulfide, Mo 8.2E-3% and Cu 1.83% in crude ore	kg	no	11.0883	7.15972	16.8003
comtrade	Molybdenum, 0.014% in sulfide, Mo 8.2E-3% and Cu 0.81% in crude ore	kg	no	11.0883	7.15972	16.8003
comtrade	Molybdenum, 0.022% in sulfide, Mo 8.2E-3% and Cu 0.36% in crude ore	kg	no	11.0883	7.15972	16.8003
comtrade	Molybdenum, 0.025% in sulfide, Mo 8.2E-3% and Cu 0.39% in crude ore	kg	no	11.0883	7.15972	16.8003
comtrade	Molybdenum, 0.016% in sulfide, Mo 8.2E-3% and Cu 0.27% in crude ore	kg	no	11.0883	7.15972	16.8003
comtrade	Molybdenum, 0.022% in sulfide, Mo 8.2E-3% and Cu 0.22% in crude ore	kg	no	11.0883	7.15972	16.8003
comtrade	TiO2, 54% in ilmenite, 18% in crude ore	kg	no	0.233355	0.0104656	0.288727
comtrade	TiO2, 95% in rutile, 0.40% in crude ore	kg	no	0.233355	0.0104656	0.288727
comtrade	TiO2, 54% in ilmenite, 2.6% in crude ore	kg	no	0.233355	0.0104656	0.288727
comtrade	Zirconium	kg	no	0.875604	0.0351238	1.1185
comtrade	Silver, Ag 1.5E-4%, Au 6.8E-4%, in ore	kg	no	5.93509	4.02525	11.8748
comtrade	Silver, Ag 1.5E-5%, Au 5.4E-4%, in ore	kg	no	5.93509	4.02525	11.8748
comtrade	Silver, 0.007% in sulfide, Ag 0.004%, Pb, Zn, Cd, In	kg	no	5.93509	4.02525	11.8748
comtrade	Silver, Ag 2.1E-4%, Au 2.1E-4%, in ore	kg	no	5.93509	4.02525	11.8748
comtrade	Silver, Ag 4.2E-3%, Au 1.1E-4%, in ore	kg	no	5.93509	4.02525	11.8748
comtrade	Silver, Ag 4.6E-5%, Au 1.3E-4%, in ore	kg	no	5.93509	4.02525	11.8748
comtrade	Silver, Ag 1.8E-6%, in mixed ore, in ground	kg	no	5.93509	4.02525	11.8748
comtrade	Silver, Ag 7.6E-5%, Au 9.7E-5%, in ore	kg	no	5.93509	4.02525	11.8748
comtrade	Silver, Ag 9.7E-4%, Au 9.7E-4%, Zn 0.63%, Cu 0.38%, Pb 0.014%, in ore	kg	no	5.93509	4.02525	11.8748
comtrade	Silver, Ag 5.4E-3%, in mixed ore	kg	no	5.93509	4.02525	11.8748
comtrade	Silver, 3.2ppm in sulfide, Ag 1.2ppm, Cu and Te, in crude ore	kg	no	5.93509	4.02525	11.8748
comtrade	Gold, Au 1.3E-4%, Ag 4.6E-5%, in ore	kg	no	3.8156	2.46589	7.14643
comtrade	Gold, Au 1.8E-4%, in mixed ore	kg	no	3.8156	2.46589	7.14643
comtrade	Gold, Au 2.1E-4%, Ag 2.1E-4%, in ore	kg	no	3.8156	2.46589	7.14643
comtrade	Gold, Au 4.3E-4%, in ore	kg	no	3.8156	2.46589	7.14643
comtrade	Gold, Au 4.9E-5%, in ore	kg	no	3.8156	2.46589	7.14643
comtrade	Gold, Au 5.4E-4%, Ag 1.5E-5%, in ore	kg	no	3.8156	2.46589	7.14643
comtrade	Gold, Au 9.7E-5%, Ag 7.6E-5%, in ore	kg	no	3.8156	2.46589	7.14643
comtrade	Gold, Au 1.0E-7%, in mixed ore, in ground	kg	no	3.8156	2.46589	7.14643
comtrade	Gold, Au 1.1E-4%, Ag 4.2E-3%, in ore	kg	no	3.8156	2.46589	7.14643
comtrade	Platinum, Pt 4.7E-7%, in mixed ore, in ground	kg	no	3.8156	2.46589	7.14643
comtrade	Platinum, Pt 4.8E-4%, Pd 2.0E-4%, Rh 2.4E-5%, Ni 3.7E-2%, Cu 5.2E-2% in ore	kg	no	3.8156	2.46589	7.14643
comtrade	Gold, Au 6.7E-4%, in ore	kg	no	3.8156	2.46589	7.14643
comtrade	Gold, Au 6.8E-4%, Ag 1.5E-4%, in ore	kg	no	3.8156	2.46589	7.14643
comtrade	Gold, Au 7.1E-4%, in ore	kg	no	3.8156	2.46589	7.14643
comtrade	Gold, Au 9.7E-4%, Ag 9.7E-4%, Zn 0.63%, Cu 0.38%, Pb 0.014%, in ore	kg	no	3.8156	2.46589	7.14643
comtrade	Platinum, Pt 2.5E-4%, Pd 7.3E-4%, Rh 2.0E-5%, Ni 2.3E+0%, Cu 3.2E+0% in ore	kg	no	3.8156	2.46589	7.14643
comtrade	Stibnite	kg	yes	2.19879	1.53894	2.97127
comtrade	Coal, hard	kg	no	0.0850659	0.0695843	0.0980012
comtrade	Coal, brown	kg	no	0.0365396	0.027523	0.0480368
comtrade	Peat	kg	no	0.118798	0.105129	0.131543
comtrade	Shale	kg	no	0.334651	0.156078	0.460655
comtrade	Iodine	kg	no	26.7047	17.3847	39.2747
comtrade	Fluorine	kg	no	2.05957	1.42379	3.29411
comtrade	Bromine	kg	no	2.05957	1.42379	3.29411
comtrade	Fluorine, 4.5% in apatite, 3% in crude ore	kg	no	2.05957	1.42379	3.29411
comtrade	Argon	kg	no	0.301002	0.234791	0.345237
comtrade	Nitrogen	kg	no	0.10179	0.0733826	0.113573
comtrade	Oxygen	kg	no	0.12134	0.0970274	0.141693
comtrade	Phosphorus	kg	yes	2.692	2.40778	3.19408
comtrade	Phosphorus, 18% in apatite, 4% in crude ore	kg	no	2.692	2.40778	3.19408
comtrade	Gadolinium	kg	yes	25.2112	12.4116	79.8802
comtrade	Samarium	kg	yes	25.2112	12.4116	79.8802
comtrade	Lanthanum	kg	yes	25.2112	12.4116	79.8802
comtrade	Spodumene	kg	no	6.85426	4.27406	10.8632
comtrade	Sodium sulfate	kg	no	0.0853542	0.0756076	0.108165
comtrade	Calcite	kg	no	0.159911	0.136244	0.201848
comtrade	Lithium	kg	yes	6.37597	3.67525	11.6447
comtrade	Strontium	kg	yes	0.944952	0.584797	1.69808
comtrade	Olivine	kg	no	0.993663	0.697092	1.20262
comtrade	Colemanite	kg	no	0.532166	0.473062	0.592724
comtrade	Cerium	kg	yes	11.2205	5.67106	31.041
comtrade	Cinnabar	kg	no	7.33906	1.40366	14.5023
comtrade	Sodium nitrate	kg	no	0.470038	0.382192	0.552799
comtrade	Carnallite	kg	no	0.260771	0.189539	0.373451
comtrade	Palladium, Pd 2.0E-4%, Pt 4.8E-4%, Rh 2.4E-5%, Ni 3.7E-2%, Cu 5.2E-2% in ore	kg	no	24351.3	3871.53	59620.9
comtrade	Palladium, Pd 7.3E-4%, Pt 2.5E-4%, Rh 2.0E-5%, Ni 2.3E+0%, Cu 3.2E+0% in ore	kg	no	24351.3	3871.53	59620.9
comtrade	Palladium, Pd 1.6E-6%, in mixed ore, in ground	kg	no	24351.3	3871.53	59620.9
comtrade	Rhodium, Rh 1.6E-7%, in mixed ore, in ground	kg	no	59519.2	14563.4	286596
comtrade	Rhodium, Rh 2.4E-5%, Pt 4.8E-4%, Pd 2.0E-4%, Ni 3.7E-2%, Cu 5.2E-2% in ore	kg	no	59519.2	14563.4	286596
comtrade	Rhodium, Rh 2.0E-5%, Pt 2.5E-4%, Pd 7.3E-4%, Ni 2.3E+0%, Cu 3.2E+0% in ore	kg	no	59519.2	14563.4	286596
comtrade	Tantalum	kg	yes	162.016	22.3988	259
comtrade	Cadmium	kg	no	1.82393	1.08747	2.46741
comtrade	Manganese	kg	no	1.77989	1.37394	2.58748
comtrade	Rhenium	kg	no	12.3341	8.98033	18.625
comtrade	Chromium	kg	no	8.88716	6.5658	11.7903
eurostat	Energy, kinetic (in wind), converted	MJ	no	0.0185833	0.0150783	0.0213918
eurostat	Energy, gross calorific value, in biomass	MJ	no	0.0185833	0.0150783	0.0213918
eurostat	Energy, gross calorific value, in biomass, primary forest	MJ	no	0.0185833	0.0150783	0.0213918
eurostat	Energy, solar, converted	MJ	no	0.0185833	0.0150783	0.0213918
eurostat	Energy, geothermal, converted	MJ	no	0.0185833	0.0150783	0.0213918
eurostat	Energy, potential (in hydropower reservoir), converted	MJ	no	0.0185833	0.0150783	0.0213918
imf	Aluminium	kg	no	1.82006	1.17982	2.70675
imf	Cobalt	kg	yes	30.1335	9.01855	67.4388
imf	Gold	kg	no	25729.6	11585.3	52241.5
imf	Iron	kg	no	0.0534248	0.0136032	0.144267
imf	Lead	kg	no	1.35497	0.607386	2.33046
imf	Molybdenum	kg	no	18.7478	10.7681	29.7513
imf	Gas, natural/m3	m3	no	0.209841	0.0839497	0.440516
imf	Oil, crude	kg	no	0.346725	0.0956511	0.640244
imf	Potassium chloride	kg	no	0.225134	0.130394	0.605825
imf	Tin	kg	no	12.1971	5.81932	22.3463
imf	Uranium	kg	no	62.6746	23.2571	173.651
imf	Zinc	kg	no	1.76094	0.872784	4.20002
none	Carbon dioxide, in air	kg	no	0	0	0
none	Carbon, organic, in soil or biomass stock	kg	no	0	0	0
none	Gas, mine, off-gas, process, coal mining/m3	m3	no	0	0	0
none	Carbon dioxide, in air	kg	no	0	0	0
none	Xenon	kg	no	0	0	0
none	Gangue, bauxite, in ground	kg	no	0	0	0
none	Carbon, organic, in soil or biomass stock	kg	no	0	0	0
none	Krypton	kg	no	0	0	0
usitc	Neodymium	kg	yes	104.081	40.0461	308.554

## Sheet: legend
source	Data source
comm	Commodity name (as in SimaPro)
um	Measurement unit
critical	Is the commodity included in the European Commission's list of critical materials?
mean	Mean value of the 2010-2019 period. Used for baseline estimates (euro/um)
min	Minimum value of the 2010-19 period. To be used in Montecarlo simulations
max	Maximum value of the 2010-19 period. To be used in Montecarlo simulations
