# Supplementary material
Source: MDPI journal article supplement (https://www.mdpi.com/2071-1050/14/10/5976)
Supplement: s1 [file s1 › SI for Sustainability_Na_LCA and CLCC_2.pdf]

# Sodium-ion batteries with $\text{Ti}_1\text{Al}_1\text{TiC}_{1.85}$ MXene as negative electrode: Life Cycle Assessment and Life Critical Resource Use Analysis

Maria Leonor Carvalho<sup>1,\*</sup>, Giulio Mela<sup>1</sup>, Andrea Temporelli<sup>1</sup>, Elisabetta Brivio<sup>1</sup>, and Pierpaolo Girardi<sup>1</sup>

<sup>1</sup> Ricerca sul Sistema Energetico – RSE SpA

\*Correspondence: marialeonor.carvalho@rse-web.it

**Summary:** This supporting information contains a full inventory of the different batteries components.

## Table of contents

|          |                                                              |          |
|----------|--------------------------------------------------------------|----------|
| <b>1</b> | <b>SYSTEM DESCRIPTION: BATTERIES PRODUCTION AND ASSEMBLY</b> | <b>1</b> |
| <b>2</b> | <b>LIFE CYCLE INVENTORY (LCI)</b>                            | <b>3</b> |
| 2.1      | Electrodes                                                   | 3        |
| 2.1.1    | Cathode                                                      | 3        |
| 2.1.2    | Anode                                                        | 4        |
| <b>3</b> | <b>RESULTS</b>                                               | <b>7</b> |
| 3.1      | LCIA – Sankey diagrams                                       | 7        |
|          | <b>REFERENCES</b>                                            | <b>9</b> |

## 1 SYSTEM DESCRIPTION: BATTERIES PRODUCTION AND ASSEMBLY

The production of each component and all the processes that refer to coin batteries production phase were modelled within SimaPro software. Datasets for Na-ion batteries are shown in Table S1.

Energy consumption related to battery coins construction and assembly phases was modelled by the low voltage Italian electricity mix, updated to 2019, as defined by [1]<sup>1</sup>. Laboratory consumption was monitored through “smart plugs” connected to an energy consumption monitoring system. For equipment connected to the network with an industrial plug, the consumption estimations were assumed, measuring the intensity of the electric current, using an amperometric clamp.

**Table S1.** Dataset for the production of a Na-ion coin battery: Na\_Laboratory (Na\_Lab) and Na\_Industrial (Na\_Ind). The source of information used is mentioned in the name.

| UF output                                                                                   | Na_Lab | Na_Ind |   |
|---------------------------------------------------------------------------------------------|--------|--------|---|
| Battery coin, Na-ion, lab RSE {IT}  production LAB   Alloc Rec, U_RSE                       | 7.18   | -      | g |
| Battery coin, Na-ion, lab RSE {IT}  production Pil2   Alloc Rec, U_RSE                      | -      | 6      | g |
| Materials Input                                                                             | Na_Lab | Na_Ind |   |
| Cathode, $\text{Na}_{0.44}\text{MnO}_2$ , for Na-Ion batteries LAB  Alloc Rec, U_RSE        | 0.0355 | -      | g |
| Cathode, $\text{Na}_{0.44}\text{MnO}_2$ _noE_for Na-Ion batteries Pil2  Alloc Rec, U_RSE    | -      | 0,0468 | g |
| Anode, Mxene, for Na-Ion batteries   Alloc Rec, U_RSE                                       | 0.0191 | -      | g |
| Anode, Mxene_noE_for Na-Ion batteries Pil2   Alloc Rec, U_RSE                               | -      | 0,0227 | g |
| Electrolyte for Na-ion battery, $\text{NaPF}_6$ {GLO}  production   Alloc Rec, U_Peters_RSE | 1.1845 | 0,0217 | g |
| Steel, low-alloyed {GLO}  market for   Alloc Rec, S                                         | 5.7695 |        | g |

<sup>1</sup> The work cited [1], refers to high voltage electricity mix production. For the transition from high to low voltage (the voltage level to which the laboratory equipment is connected), network losses of 5.6% were considered.

|                                                                                   |        |        |     |
|-----------------------------------------------------------------------------------|--------|--------|-----|
| Styrene-butadiene rubber SBR {RER}  production   Alloc Rec, U_Peters_RSE          | 0.1405 |        | g   |
| Glass fibre {GLO} market for   Allo Rec, S                                        | 0.0268 | -      | g   |
| Battery separator {GLO} market for   Allo Rec, S                                  | -      | 0.0004 | g   |
| Electricity/heat                                                                  | Na_Lab | Na_Ind |     |
| Electricity, low voltage {IT}  Electricity Production mix 2019   Alloc Rec, U_RSE | -      | 0.002  | kWh |

For the industrial Lithium-ion battery (Li\_Ind), a pouch cell (NMC type) from an automotive battery has been broken down and all the elements present inside have been classified (Figure S1).

Once components were catalogued, samples were taken and weight. Data was provided with reference to a 1 cm diameter disc of each assessed component: anode, cathode, and separator. Considering the battery design (coin), the active material was considered to be present only in one side of the charge carrier, and not in both sides as in the pouch configuration.

Datasets for Li\_Ind coin battery are shown in Table S2.

Energy consumption related to battery construction and assembly phases was modelled by the low voltage Italian electricity mix, updated to 2019, as defined by [1]<sup>2</sup>.

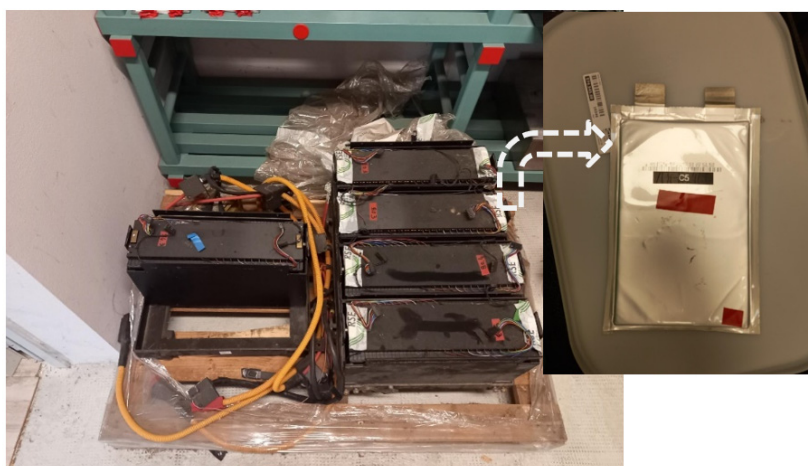

**Figure S1.** Part of a lithium-ion automotive battery (and cell pouch).

**Table S2.** Dataset for the production of a Li-ion coin battery; Li\_Industrial (Li\_Ind). The source of information used is mentioned in the name.

|                                                                                                         |        |     |
|---------------------------------------------------------------------------------------------------------|--------|-----|
| <b>UF output</b>                                                                                        |        |     |
| Battery coin_EpouchLi_Li-ion NMC 532, lab RSE {IT}  production   Alloc Rec, U_RSE                       | 6.11   | g   |
| <b>Materials Input</b>                                                                                  |        |     |
| Positive electrode material for Li-Ion battery_NMC 532   Alloc Rec, U_RSE_FAAM                          | 0.0362 | g   |
| Electrode substrate for Li-ion battery_positive electrode  Alloc Rec, U_FAAM for COIN_RSE               | 0.0106 | g   |
| Negative carbonaceous electrode material for Li-Ion battery_NMC   Alloc Rec, U_FAAM_RSE                 | 0.0232 | g   |
| Electrode substrate for Li-ion battery_negative electrode   Alloc Rec, U_FAAM_RSE                       | 0.0182 | g   |
| Electrolyte for Li-ion battery, 1M LiPF <sub>6</sub> {GLO}  production   Alloc Rec, U_Majeau-Bettez_RSE | 0.0217 | g   |
| Battery separator {GLO}   market for   Alloc Rec, S                                                     | 0.0004 | g   |
| Steel, low-alloyed {GLO}   market for   Alloc Rec, S                                                    | 5.7695 | g   |
| Styrene-butadiene rubber SBR {RER}  production   Alloc Rec, U_Peters_RSE                                | 0.1405 | g   |
| <b>Electricity/heat</b>                                                                                 |        |     |
| Electricity, low voltage {IT}  Electricity Production mix 2019   Alloc Rec, U_RSE                       | 0.0011 | kWh |

<sup>2</sup> The work cited [1], refers to gross production. For the transition from high to low voltage (the voltage level to which the laboratory equipment is connected), network losses of 5.6% were considered.

## 2 LIFE CYCLE INVENTORY (LCI)

### 2.1 Electrodes

#### 2.1.1 Cathode

##### 2.1.1.1 Na batteries

The positive electrode (cathode) is covered with electro-chemically active materials, an aggregate (binder) and carbon black. The active material is  $\text{Na}_{0.44}\text{MnO}_2$ .

Binder is Polyvinylidene fluoride (PVDF), and the solvent is N-methylpyrrolidone (NMP). Solvent evaporates after application of electrode pastes to current collectors.

The production of the active material was modelled according to primary laboratory data.

**Table S3.** Dataset for the production of the positive electrode. The source of information used is mentioned in the name

| UF output                                                                                            | Na_Lab | Na_Ind |   |
|------------------------------------------------------------------------------------------------------|--------|--------|---|
| Cathode, $\text{Na}_{0.44}\text{MnO}_2$ , for Na-Ion batteries LAB   Alloc Rec, U_RSE                | 0.0355 | -      | g |
| Cathode, $\text{Na}_{0.44}\text{MnO}_2$ _noE_for Na-Ion batteries Pil2   Alloc Rec, U_RSE            | -      | 0.0468 | g |
| Materials Input                                                                                      | Na_Lab | Na_Ind |   |
| Aluminium, wrought alloy {GLO}   market for   Alloc Rec, U                                           | 0.0140 | 0.0106 | g |
| Sheet rolling, aluminium {GLO}   market for   Alloc Rec, U                                           | 0.0140 | 0.0106 | g |
| Ink_ $\text{Na}_{0.44}\text{MnO}_2$ active material, for Na-Ion batteries   Alloc Rec, U_RSE         | 0.0215 | -      | g |
| Ink_ $\text{Na}_{0.44}\text{MnO}_2$ active material_noE_for Na-Ion batteries Pil2   Alloc Rec, U_RSE | -      | 0.0362 | g |

**Table S4.** Dataset for the ink production step. The source of information used is mentioned in the name

| UF output                                                                                            | Na_Lab | Na_Ind |     |
|------------------------------------------------------------------------------------------------------|--------|--------|-----|
| Ink_ $\text{Na}_{0.44}\text{MnO}_2$ active material, for Na-Ion batteries   Alloc Rec, U_RSE         | 0.2    |        | g   |
| Ink_ $\text{Na}_{0.44}\text{MnO}_2$ active material_noE_for Na-Ion batteries Pil2   Alloc Rec, U_RSE |        |        |     |
| Materials Input                                                                                      | Na_Lab | Na_Ind |     |
| $\text{Na}_{0.44}\text{MnO}_2$ active material, for Na-Ion batteries   Alloc Rec, U_RSE              | 0.160  | -      | g   |
| $\text{Na}_{0.44}\text{MnO}_2$ active material_noE_for Na-Ion batteries   Alloc Rec, U_RSE           | -      | 0.194  | g   |
| Polyvinylfluoride {GLO}   market for   Alloc Rec, U                                                  | 0.02   | 0.003  | g   |
| Carbon black {GLO}   market for   Alloc Rec, U                                                       | 0.02   | 0.003  | g   |
| N-methyl-2-pyrrolidone {GLO}   market for   Alloc Rec, U                                             | 0.721  | 0.213  | g   |
| Electricity/heat                                                                                     | Na_Lab | Na_Ind |     |
| Electricity, low voltage {IT}   Electricity Production mix 2019   Alloc Rec, U_RSE                   | 0.5172 | -      | kWh |
| Emissions                                                                                            | Na_Lab | Na_Ind |     |
| 1-Methyl-2-pyrrolidinone                                                                             | 0.721  | 0.213  | g   |

**Table S5.** Dataset for the production of the active material  $\text{Na}_{0.44}\text{Mn}_{0.9}\text{Cu}_{0.1}\text{O}_2$ . The source of information used is mentioned in the name.

| UF output                                                                                  | Na_Lab | Na_Ind |   |
|--------------------------------------------------------------------------------------------|--------|--------|---|
| $\text{Na}_{0.44}\text{MnO}_2$ active material, for Na-Ion batteries   Alloc Rec, U_RSE    | 2      | -      | g |
| $\text{Na}_{0.44}\text{MnO}_2$ active material_noE_for Na-Ion batteries   Alloc Rec, U_RSE | -      | 2      | g |
| Materials Input                                                                            | Na_Lab | Na_Ind |   |
| Sodium acetate {RER}   Alloc Rec, U_RSE (modelled according to [2])                        | 0.744  |        | g |

|                                                                                                                                              |        |        |     |
|----------------------------------------------------------------------------------------------------------------------------------------------|--------|--------|-----|
| Manganese acetate {RER}  production   Alloc Rec, U_RSE (modelled according to [3])                                                           | 3.566  |        | g   |
| Citric acid {GLO}  market for   Alloc Rec, U                                                                                                 | 6.474  |        | g   |
| Water, deionised, from tap water, at user {Europe without Switzerland}   market for water, deionised, from tap water, at user   Alloc Rec, U | 120    |        | g   |
| Electricity/heat                                                                                                                             | Na_Lab | Na_Ind |     |
| Electricity, low voltage {IT}  Electricity Production mix 2019  Alloc Rec, U - RSE                                                           | 0.13   | -      | kWh |
| Emissions                                                                                                                                    | Na_Lab | Na_Ind |     |
| Citric acid                                                                                                                                  | 6.474  |        | g   |
| Water                                                                                                                                        | 120    |        | g   |

### 2.1.1.2 Li batteries

For the positive electrode, it was assumed the same inventory for the production of positive electrode (based on NMC 532) reported by [2].

## 2.1.2 Anode

### 2.1.2.1 Na batteries

The negative electrode (anode) is covered with electro-chemically active materials, an aggregate (binder) and carbon black. The active material is  $\text{Ti}_1\text{Al}_1\text{TiC}_{1.85}$  MXene.

Binder is Polyvinylidene fluoride (PVDF), and the solvent is N-methylpyrrolidone (NMP). Solvent evaporates after application of electrode pastes to current collectors.

The production of the active material was modelled according to primary laboratory data.

**Table S6.** Dataset for the production of the negative electrode. The source of information used is mentioned in the name

| UF output                                                                 | Na_Lab | Na_Ind |   |
|---------------------------------------------------------------------------|--------|--------|---|
| Anode, MXene, for Na-Ion batteries   Alloc Rec, U_RSE                     | 0.0191 | -      | g |
| Anode, MXene_noE_for Na-Ion batteries Ind   Alloc Rec, U_RSE              | -      | 0.0227 | g |
| Materials Input                                                           | Na_Lab | Na_Ind |   |
| Aluminium, wrought alloy {GLO}  market for   Alloc Rec, U                 | 0.0140 | 0.0106 | g |
| Sheet rolling, aluminium {GLO}  market for   Alloc Rec, U                 | 0.0140 | 0.0106 | g |
| Ink_Mxene active material, for Na-Ion batteries   Alloc Rec, U_RSE        | 0.0051 | -      | g |
| Ink_MXene active material_noE_for Na-Ion batteries Ind   Alloc Rec, U_RSE | -      | 0.0121 | g |

**Table S7.** Dataset for the ink production step. The source of information used is mentioned in the name

| UF output                                                                          | Na_Lab | Na_Ind |     |
|------------------------------------------------------------------------------------|--------|--------|-----|
| Ink_MXene active material, for Na-Ion batteries   Alloc Rec, U_RSE                 | 0.2    |        | g   |
| Ink_MXene active material_noE_for Na-Ion batteries Ind   Alloc Rec, U_RSE          |        |        |     |
| Materials Input                                                                    | Na_Lab | Na_Ind |     |
| MXene_after cleaning for Na-Ion batteries   Alloc Rec, U_RSE                       | 0.16   |        | g   |
| MXene_after cleaning_noE_for Na-Ion batteries Pil   Alloc Rec, U_RSE               | -      | 0.194  | g   |
| Polyvinylfluoride {GLO}  market for   Alloc Rec, U                                 | 0.02   | 0.003  | g   |
| Carbon black {GLO}  market for   Alloc Rec, U                                      | 0.02   | 0.003  | g   |
| N-methyl-2-pyrrolidone {GLO}  market for   Alloc Rec, U                            | 0.721  | 0.213  | g   |
| Electricity/heat                                                                   | Na_Lab | Na_Ind |     |
| Electricity, low voltage {IT}  Electricity Production mix 2019  Alloc Rec, U - RSE | 0.52   | -      | kWh |
| Emissions                                                                          | Na_Lab | Na_Ind |     |

|                          |       |       |   |
|--------------------------|-------|-------|---|
| 1-Methyl-2-pyrrolidinone | 0.721 | 0.213 | g |
|--------------------------|-------|-------|---|

**Table S8.** Dataset for the production of MXene: after cleaning process. The source of information used is mentioned in the name

| UF output                                                                                                                                   | Na_Lab | Na_Ind |   |
|---------------------------------------------------------------------------------------------------------------------------------------------|--------|--------|---|
| MXene_after cleaning, for Na-Ion batteries   Alloc Rec, U_RSE                                                                               | 3      |        | g |
| MXene_after cleaning_noE_for Na-Ion batteries Pil   Alloc Rec, U_RSE                                                                        |        |        |   |
| Materials Input                                                                                                                             | Na_Lab | Na_Ind |   |
| MAXphase sintering, for Na-Ion batteries   Alloc Rec, U_RSE                                                                                 | 3      | -      | g |
| MAXphase sintering_noE_for Na-Ion batteries   Alloc Rec, U_RSE                                                                              | -      | 3      | g |
| Hydrogen fluoride {GLO}  market for   Alloc Rec, U                                                                                          | 11.88  | 1.018  | g |
| Water, deionised, from tap water, at user {Europe without Switzerland}  market for water, deionised, from tap water, at user   Alloc Rec, U | 1028.1 | 1039   | g |
| Emissions                                                                                                                                   | Na_Lab | Na_Ind |   |
| Water                                                                                                                                       | 1028.1 | 1039   | g |
| Hydrogen fluoride                                                                                                                           | 11.88  | 1.018  | g |

**Table S9.** Dataset for the production of MAXphase: sintering process. The source of information used is mentioned in the name

| UF output                                                                                                       | Na_Lab | Na_Ind |     |
|-----------------------------------------------------------------------------------------------------------------|--------|--------|-----|
| MAXphase sintering, for Na-Ion batteries   Alloc Rec, U_RSE                                                     | 12     | -      | g   |
| MAXphase sintering_noE_for Na-Ion batteries   Alloc Rec, U_RSE                                                  | -      | 12     | g   |
| Materials Input                                                                                                 | Na_Lab | Na_Ind |     |
| Ti <sub>1</sub> Al <sub>1</sub> TiC <sub>1.85</sub> active material, for Na-Ion batteries   Alloc Rec, U_RSE    | 12     | -      | g   |
| Ti <sub>1</sub> Al <sub>1</sub> TiC <sub>1.85</sub> active material_noE_for Na-Ion batteries   Alloc Rec, U_RSE | -      | 12     |     |
| Graphite {RER}  production   Alloc Rec, U                                                                       | 15     | 15     | g   |
| Graphite, battery grade {GLO}  market for   Alloc Rec, U                                                        | 3      | 3      | g   |
| Boron nitride BN {GLO}  market for   Alloc Rec, U_RSE                                                           | 0.75   | 0.75   | g   |
| Electricity/heat                                                                                                | Na_Lab | Na_Ind |     |
| Electricity, low voltage {IT}  Electricity Production mix 2019   Alloc Rec, U_RSE                               | 7.6    | -      | kWh |

**Table S10.** Dataset for the Ti<sub>1</sub>Al<sub>1</sub>TiC<sub>1.85</sub> active material production. The source of information used is mentioned in the name

| UF output                                                                                                       | Na_Lab | Na_Ind |     |
|-----------------------------------------------------------------------------------------------------------------|--------|--------|-----|
| Ti <sub>1</sub> Al <sub>1</sub> TiC <sub>1.85</sub> active material, for Na-Ion batteries   Alloc Rec, U_RSE    | 40.09  |        | g   |
| Ti <sub>1</sub> Al <sub>1</sub> TiC <sub>1.85</sub> active material_noE_for Na-Ion batteries   Alloc Rec, U_RSE |        |        |     |
| Materials Input                                                                                                 | Na_Lab | Na_Ind |     |
| Titanium, primary {GLO}  market for   Alloc Rec, U                                                              | 10.31  |        | g   |
| Aluminium, primary {GLO}  market for   Alloc Rec, U                                                             | 5.81   |        | g   |
| Titanium carbide, Tic {RER}  production   Alloc Rec, U_RSE                                                      | 23.9   |        | g   |
| Electricity/heat                                                                                                | Na_Lab | Na_Ind |     |
| Electricity, low voltage {IT}  Electricity Production mix 2019  Alloc Rec, U_RSE                                | 0.4    | -      | kWh |

Boron nitride (BN) production was modelled in the Simapro considering the following chemical reaction (boric acid with urea):

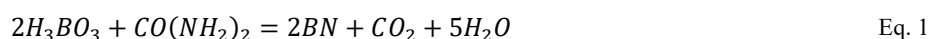

**Table S11.** Dataset for the boron nitride production. The source of information used is mentioned in the name

| UF output                                                     |       |    |
|---------------------------------------------------------------|-------|----|
| Boron nitride BN {GLO}  market for   Alloc Rec, U_RSE         | 1     | kg |
| Materials Input                                               |       |    |
| Boric acid, anhydrous, power {GLO}  market fir   Alloc Rec, U | 2.491 | kg |
| Urea, as N {RER}  production   Alloc Rec, U                   | 1.210 | kg |
| Emissions                                                     |       |    |
| Carbon dioxide                                                | 0.887 | kg |
| Water                                                         | 1.815 | kg |

Titanium carbide production was modelled in the Simapro considering the following chemical reaction, where titanium dioxide reacts with carbon at high temperature (2000 ° C):

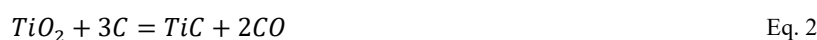

**Table S12.** Dataset for the boron nitride production. The source of information used is mentioned in the name

| UF output                                                          |          |     |
|--------------------------------------------------------------------|----------|-----|
| Titanium carbide, TiC {RER}  production   Alloc Rec, U_RSE         | 1        | kg  |
| Materials Input                                                    |          |     |
| Chemical factory, organics {GLO}  market for   Alloc Rec, U        | 4E-10    | p   |
| Titanium dioxide {RER}  market for   Alloc Rec, U                  | 1.333815 | kg  |
| Electricity/heat                                                   |          |     |
| Coke {GLO}  market for   Alloc Rec, U                              | 19.3     | MJ  |
| Electricity, medium voltage {RER}  market group for   Alloc Rec, U | 3.1      | kWh |
| Emissions                                                          |          |     |
| Methane, fossil                                                    | 0.00148  | kg  |
| Carbon monoxide, fossil                                            | 0.935577 | kg  |
| Hydrogen                                                           | 0.00388  | kg  |
| Carbon dioxide, fossil                                             | 0.0122   | kg  |

#### 2.1.2.2 Li batteries

For the negative electrode, it was assumed the same inventory for the production of negative electrode reported by [2].

#### 2.1.2.3 Separator

The separator role is to prevent electrodes (anode and cathode) from touching, while electrons flow in the electrolyte with as little resistance as possible.

For Na batteries:

- Na laboratory: the separator is a whatman microfiber filter (*i.e.*, glass fiber), the Ecoinvent dataset *Glass fiber {GLO}| market for | Allo Rec, S* was used as a proxy.
- Na Industrial: it was assumed the same reported by Peters et al [5] for Na batteries *Battery separator {GLO}| market for | Allo Rec, S*.

For the Li battery, it was assumed the same separator as reported by Majeau-Bettez et al. [3].

#### 2.1.2.4 Electrolyte

Na batteries

The electrolyte is made of sodium salts ( $\text{NaPF}_6$ ) in a mixture of carbonate solvents. It was considered the same inventory reported by Peters et al [5].

#### Li battery

The electrolyte is made of lithium salt ( $\text{LiPF}_6$ ) and solvents. In this study, it was assumed the inventory for the production of electrolyte reported by Ellingsen et al. [7].

#### 2.1.2.5 Cell container

The cell container is a coin type that consists of a lower case (positive pole), an upper case (negative pole), a disk and a spring. All steel components were modelled in SimaPro considering the Ecoinvent dataset: *Steel low-alloyed {GLO} | market for | Alloc Rec, S*. For the gasket, the *Styrene-butadiene rubber SBR {RER} | production | Alloc Rec, U\_Peters\_RSE* dataset was considered.

## 3 RESULTS

### 3.1 LCIA – Sankey diagrams

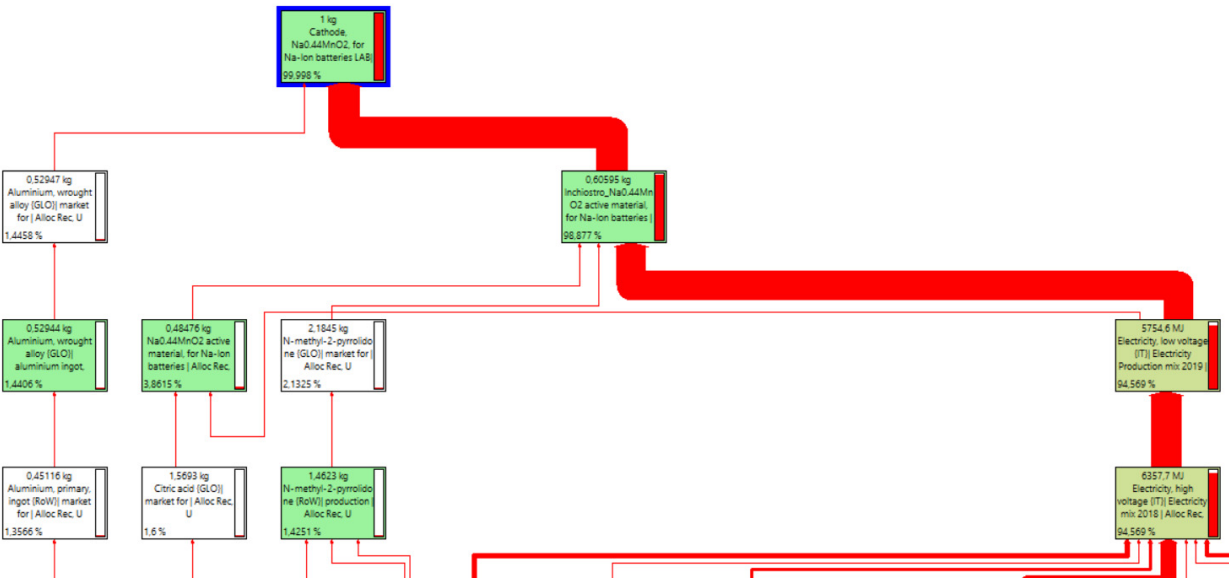

**Figure S2.** Na-ion laboratory coin battery: Sankey diagram for Climate Change impact category, expressed in %, for the production of 1 kg of  $\text{Na}_{0.44}\text{MnO}_2$  cathode.

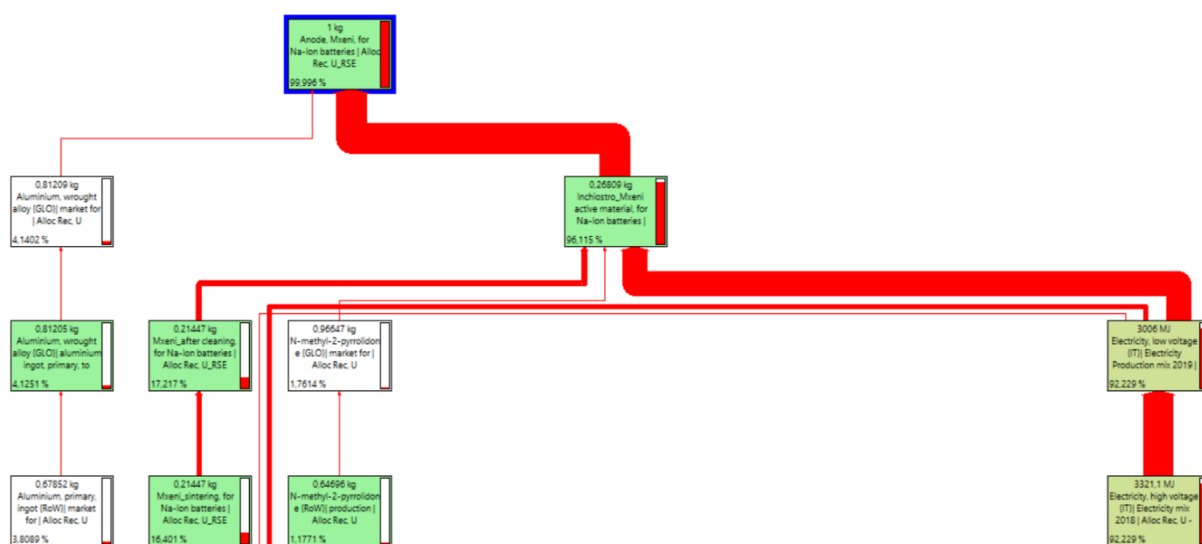

**Figure S3.** Na-ion laboratory coin battery: Sankey diagram for Climate Change impact category, expressed in %, for the production of 1 kg of anode.

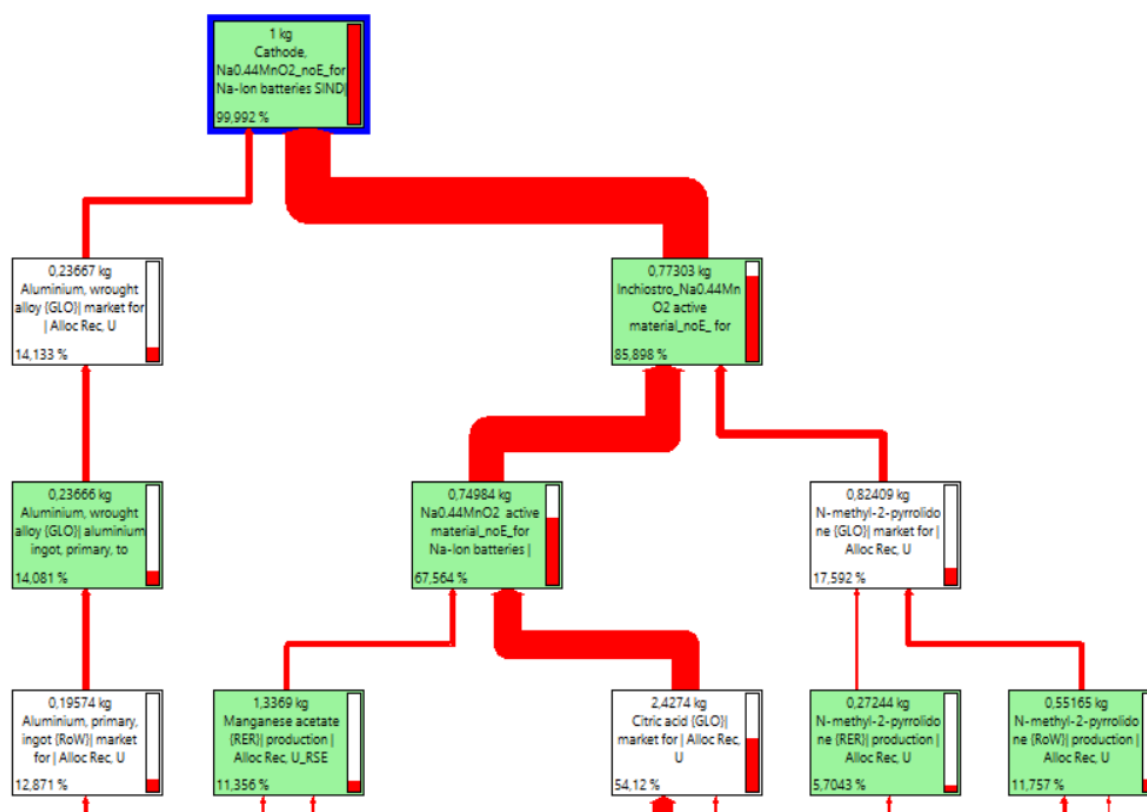

**Figure S4.** Na-ion industrial coin battery: Sankey diagrams for Climate Change impact category, expressed in %, for the production of 1 kg of  $\text{Na}_{0.44}\text{MnO}_2$  cathode.

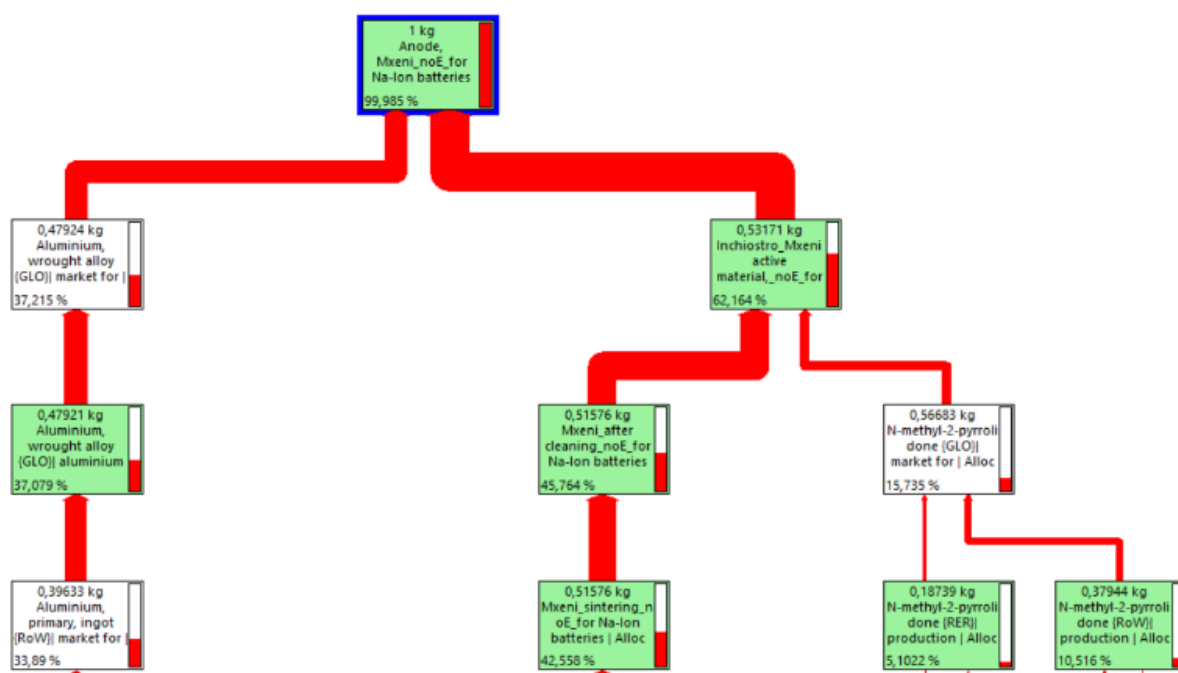

**Figure S5.** Na-ion industrial coin battery: Sankey diagrams for Climate Change impact category, expressed in %, for the production of 1 kg of anode.

## REFERENCES

- [1] A. Gargiulo, M. L. Carvalho e P. Girardi, «Life Cycle Assessment of Italian Electricity Scenarios to 2030,» *Energies*, vol. 15, n. 13, p. 3852, 2020.
- [2] N. Jungbluth, «Life Cycle Inventory of Sodium Acetate and Expanded Graphite,» ESU-servives Ltd., 2008.
- [3] Q. Dai, «Life Cycle Assessment of Natural Gas Utilization in Light-duty Passenger Vehicles,» Civil and Environmental Engineering Ann Arbor, University of Michigan, MI (USA), 2014.
- [4] M. L. Carvalho, T. Andrea e P. Girardi, «Life Cycle Assessment of Stationary Storage Systems within the Italian Electric Network,» *Energies*, vol. 14, 2021.
- [5] J. Peters, D. Buchholz, S. Passerini e M. Weil, «Life cycle assessment of sodium-ion batteries,» *Energy & Environmental Science*, n. 9, p. 1744, 2016.
- [6] G. Majeau-Bettez, T. R. Hawkins e A. H. Strømman, «Life cycle environmental assessment of lithium-ion and nickel metal hydride batteries for plug-in hybrid and battery electric vehicles,» *Environmental science & technology*, vol. 45, n. 10, pp. 4548-4554, 2011.
- [7] L. A. W. Ellingsen, G. Majeau-Bettez, B. Singh, A. K. Srivastava, L. O. Valøen e A. H. Strømman, «Life Cycle Assessment of a Lithium-Ion Battery Vehicle Pack,» *Journal of Industrial Ecology*, n. 18, p. 113–124, 2014.
